# Supplementary material
Source: publisher figshare collection journal article supplement (https://acs.figshare.com/ndownloader/files/12750074)
Supplement: Supplementary file 1 [file 12750074]

## **Supporting Information for:**

# **Targeted Ligand Exchange Chemistry on Cesium Lead Halide Perovskite Quantum Dots for High-Efficiency Photovoltaics**

Lance M. Wheeler,<sup>1\*</sup> Erin M. Sanehira,<sup>1,2</sup> Ashley R. Marshall,<sup>1,4</sup> Philip Schulz,<sup>1,5</sup> Mokshin Suri,<sup>3</sup> Nicholas C. Anderson,<sup>1†</sup> Jeffrey A. Christians,<sup>1</sup> Dennis Nordlund<sup>6</sup>, Dimosthenis Sokaras<sup>6</sup>, Steven P. Harvey,<sup>1</sup> Joseph J. Berry,<sup>1</sup> Lih Y. Lin,<sup>2</sup> and Joseph M. Luther<sup>1\*</sup>

<sup>1</sup>National Renewable Energy Laboratory, Golden, CO, 80401, USA

<sup>2</sup>Department of Electrical Engineering, University of Washington, Seattle, WA 98195, USA

<sup>3</sup>McKetta Department of Chemical Engineering and Texas Materials Institute, The University of Texas at Austin, Austin, Texas 78712-1062

<sup>4</sup>Department of Chemistry and Biochemistry, University of Colorado, Boulder, CO, 80309, USA

<sup>5</sup>CNRS, Institut Photovoltaïque d'Île de France (IPVF), UMR 9006, 91120 Palaiseau, France

<sup>6</sup>Stanford Synchrotron Radiation Lightsource, SLAC National Accelerator Laboratory, Menlo Park, CA 94025, USA

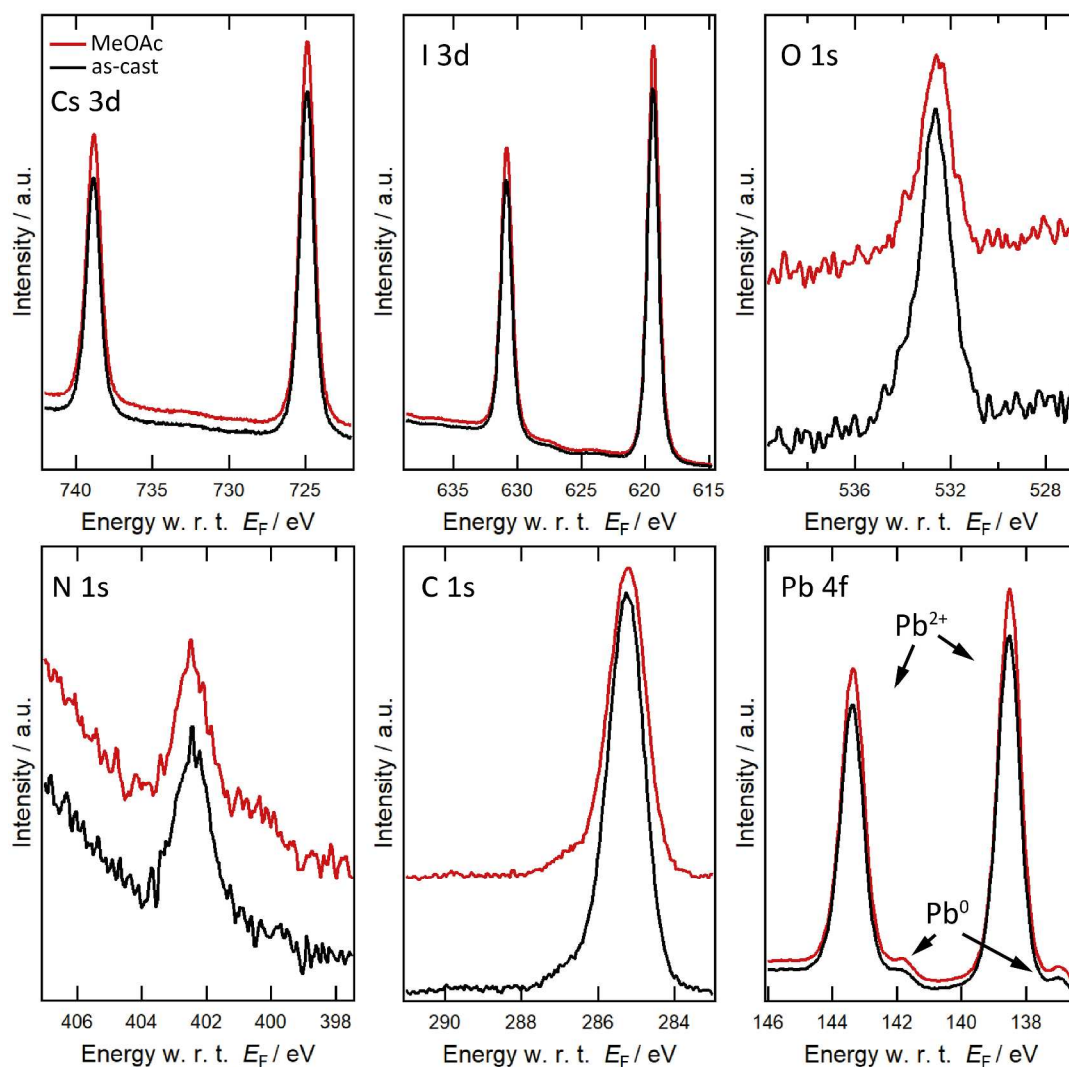

**Figure S1.** XPS core level spectra of CsPbI<sub>3</sub> QD thin-films before and after treatment with saturated Pb(NO<sub>3</sub>)<sub>2</sub> in MeOAc. Prolonged exposure to X-rays during the XPS measurements lead to the emergence of a small metallic lead (Pb<sup>0</sup>) contribution.

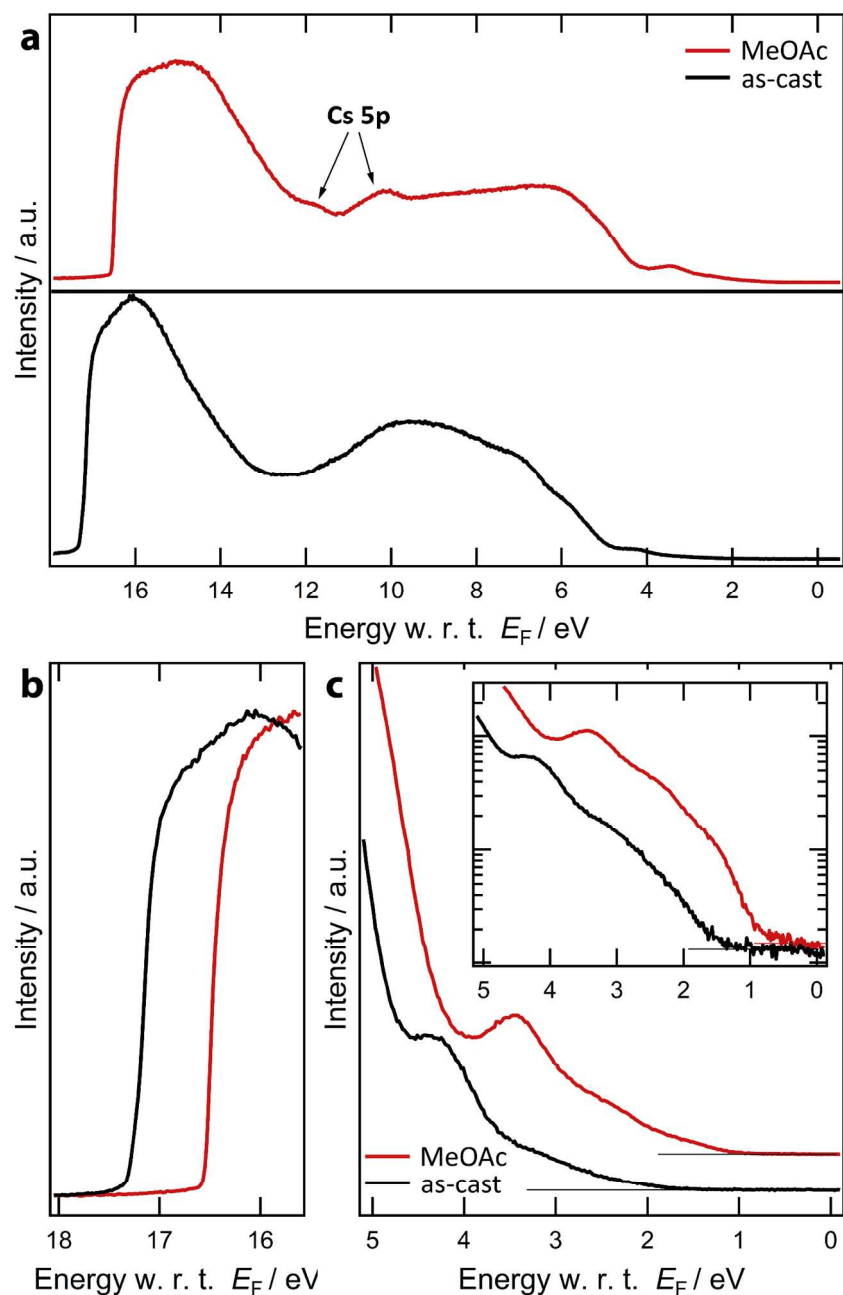

**Figure S2.** UPS spectra of CsPbI<sub>3</sub> QD thin-films before and after treatment with MeOAc. (a) Survey scan, (b) secondary electron cut-off, and (c) valence band region (inset in semi-logarithmic scale). An apparent change of the work function by over 0.7 eV is accompanied by a concomitant shift in the valence band onset, which could be related to charging or pronounced surface band bending during the measurement as a function of surfactant coverage.

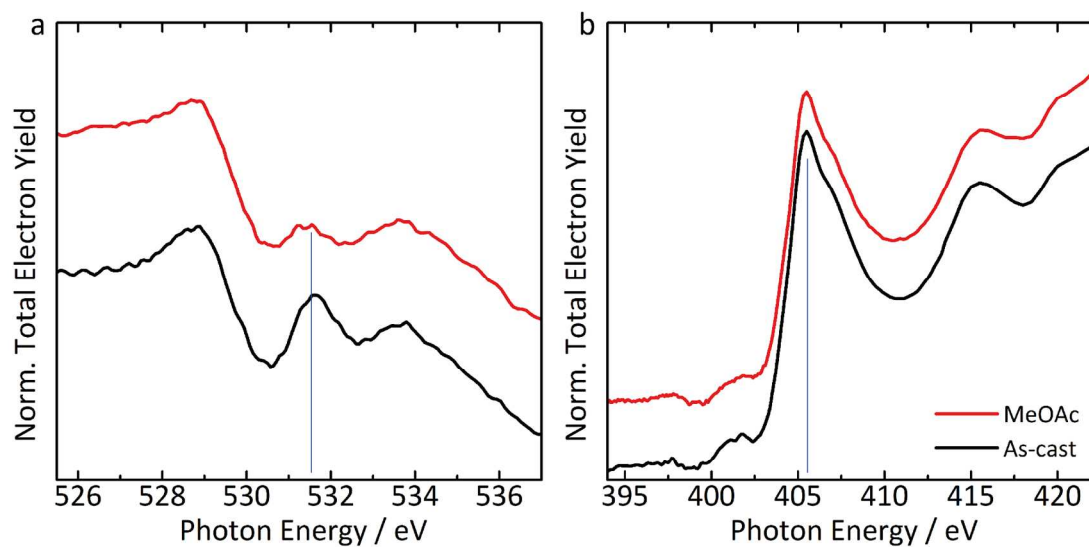

**Figure S3.** Soft X-ray XAS spectra of CsPbI<sub>3</sub> QD thin-films before and after treatment with MeOAc at the (a) oxygen K-edge and (b) nitrogen K-edge. Vertical lines act as guide to the eye and mark the principal spectra fingerprints of carboxylate (carboxyl) and ammonium moieties, respectively.

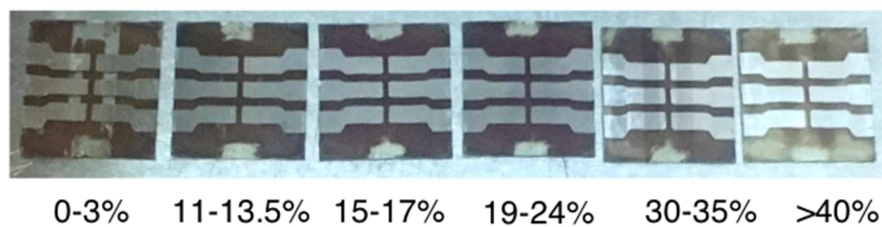

**Figure S4.** Labels below the image indicate the relative humidity (RH).

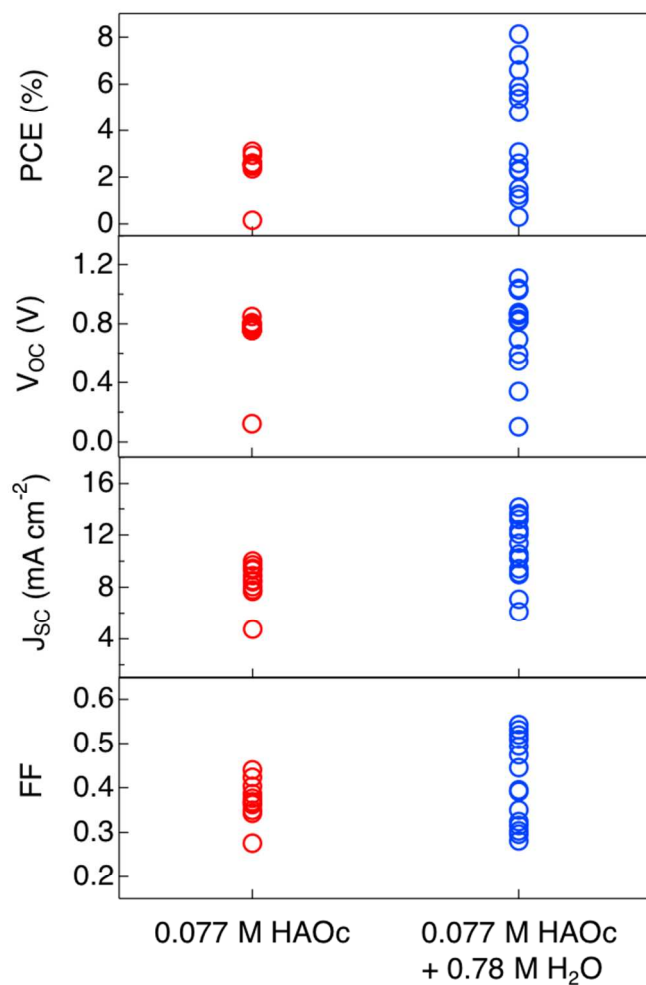

**Figure S5.** PV device statistics for samples fabricated with acetic acid and water incorporated into the film treatment solution.

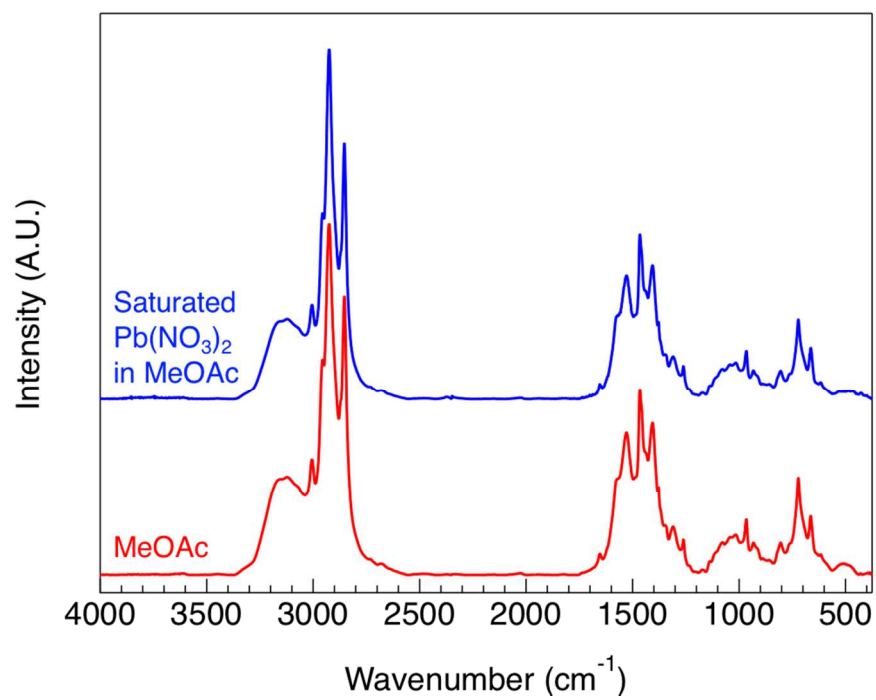

**Figure S6.** FTIR of CsPbI<sub>3</sub> QDs treated with neat MeOAc (red) and saturated Pb(NO<sub>3</sub>)<sub>2</sub> in MeOAc

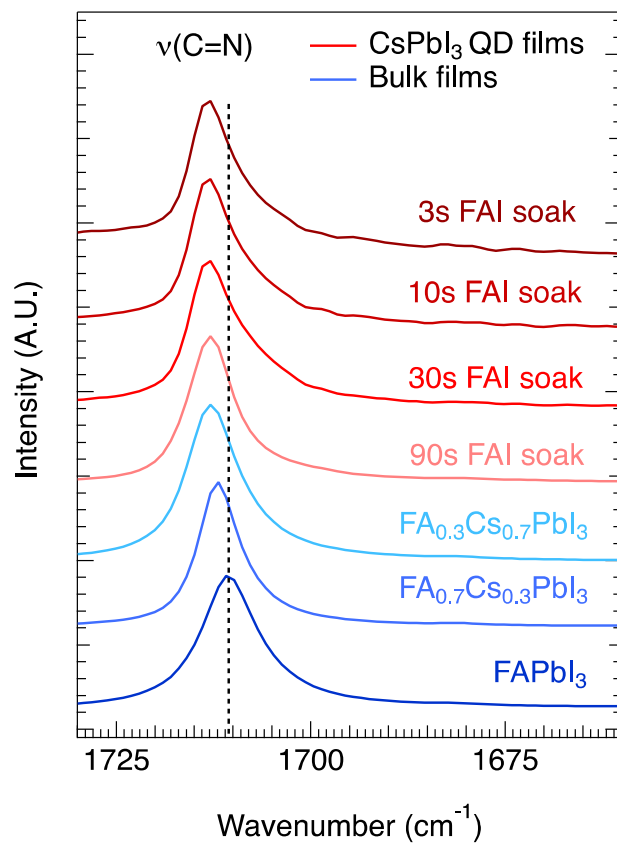

**Figure S7.** FTIR spectra highlighting the  $\nu(\text{C}=\text{N})$  resonance that is blueshifted on the surface of QDs (shades of red) compared to the bulk films (shades of blue).



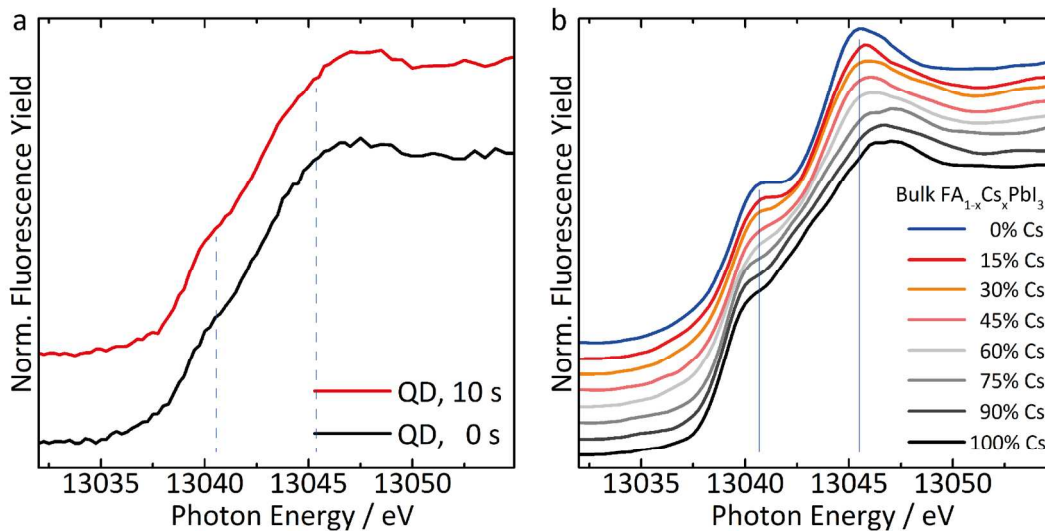

**Figure S8.** Hard X-ray XAS spectra of (a)  $\text{CsPbI}_3$  QD thin-films after treatment with saturated  $\text{Pb}(\text{NO}_3)_2$  in MeOAc and subsequent exposure to FAI in EtOAc (for 0 and 10 s, respectively), and of (b) bulk  $\text{FA}_{1-x}\text{Cs}_x\text{PbI}_3$  thin-films for comparison. Vertical lines indicate distinct features corresponding to Pb coordinated in  $\text{PbI}_6$  octahedra of FA rich thin-films.
